# Supplementary material for: The interfacial degradation mechanism of polymer:fullerene bis-adduct solar cells and their stability improvement
Source: Royal Society of Chemistry journal article supplement (doi:10.1039/d0ma00277a), 2020-01-01
Supplement: d0ma00277a1.pdf [file d0ma00277a1.pdf]

## **Interfacial degradation of the polymer:fullerene bis-adduct solar cells and methods for the stability improvement**

Lingpeng Yan,<sup>a,b</sup> Huimin Gu<sup>a,d</sup>, Zerui Li,<sup>a</sup> Jianqi Zhang,<sup>c</sup> Yongzhen Yang,<sup>d,\*</sup>

Hua Wang,<sup>d</sup> Xuguang Liu,<sup>b</sup> Zhixiang Wei,<sup>c</sup> Qun Luo,<sup>a</sup> Chang-Qi Ma<sup>a,\*</sup>

<sup>a</sup> Printed Electronics Research Center, Suzhou Institute of Nano-Tech and Nano-Bionics, Chinese Academy of Sciences (CAS), Suzhou 215123, P. R. China

<sup>b</sup> Institute of New Carbon Materials, Taiyuan University of Technology, 79 Yingze Street, Taiyuan 030024, P. R. China.

<sup>c</sup> CAS Key Laboratory of Nanosystem and Hierarchical Fabrication, CAS Center for Excellence in Nanoscience, National Center for Nanoscience and Technology, Beijing 100190, P. R. China

<sup>d</sup> Key Laboratory of Interface Science and Engineering in Advanced Materials, Ministry of Education, Taiyuan University of Technology, Taiyuan 030024, P. R. China

## Support Information

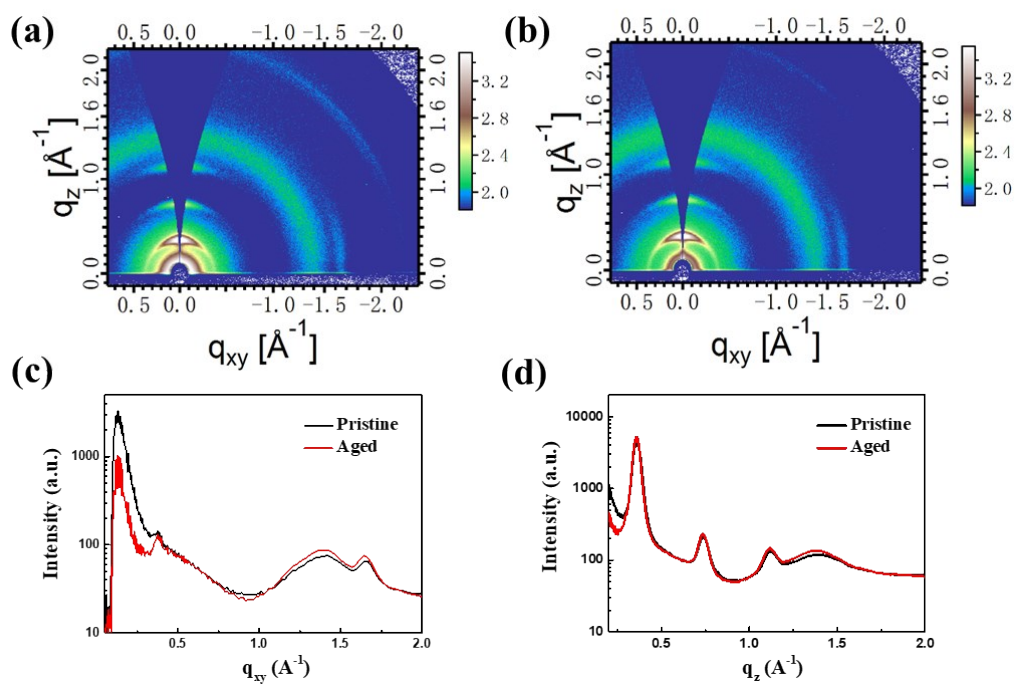

Figure S1 2D GIWAXS patterns of pristine (a) and aged (b) P3HT:bis-PC<sub>61</sub>BM blend films. In-plane (c) and out-of-plane (d) profiles of these films.

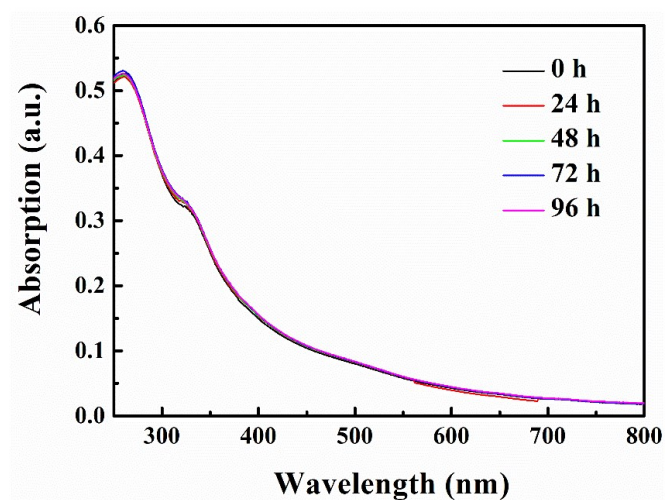

Figure S2 UV-Vis spectra of bis-PC<sub>61</sub>BM film exposed to continuous illumination for different time

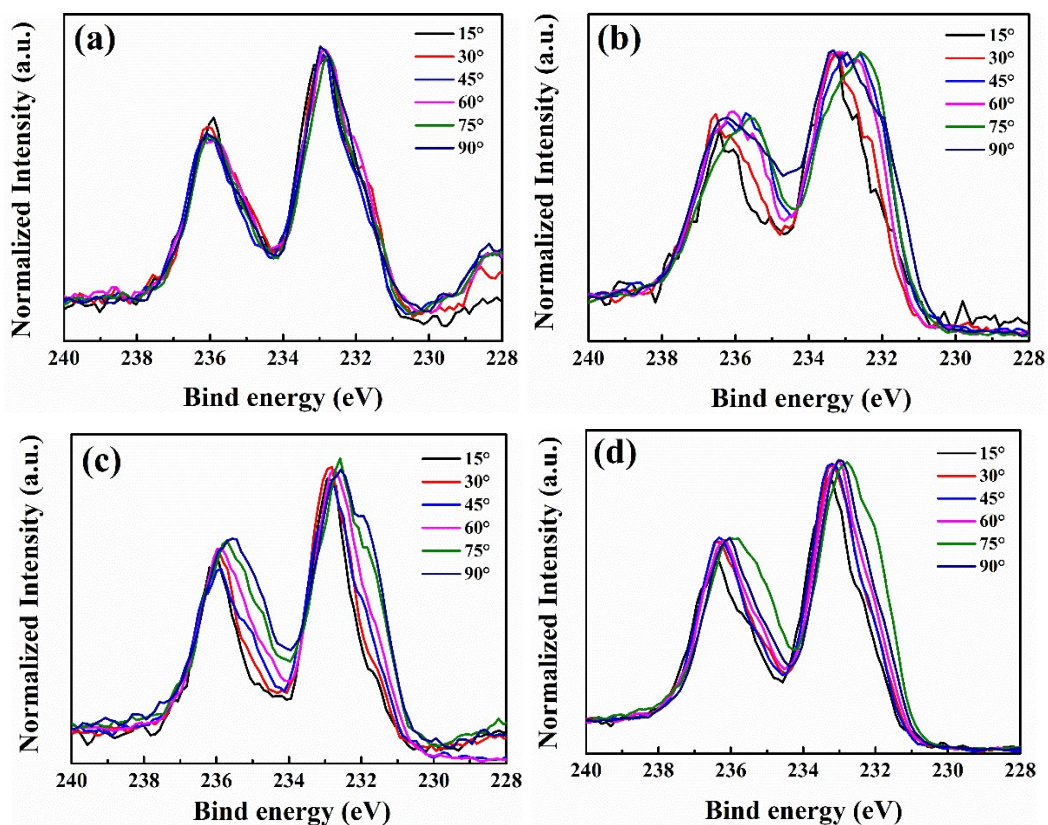

Figure S3 ARXPS spectra of the Mo 3d core level peaks for the pristine P3HT:bis-PC<sub>61</sub>BM/MoO<sub>3</sub> films (a), aged P3HT:bis-PC<sub>61</sub>BM/MoO<sub>3</sub> films (b), aged P3HT:bis-PC<sub>61</sub>BM/C<sub>60</sub>/MoO<sub>3</sub> films (c) and aged P3HT:bis-PC<sub>61</sub>BM:piperazine/MoO<sub>3</sub> films (d).

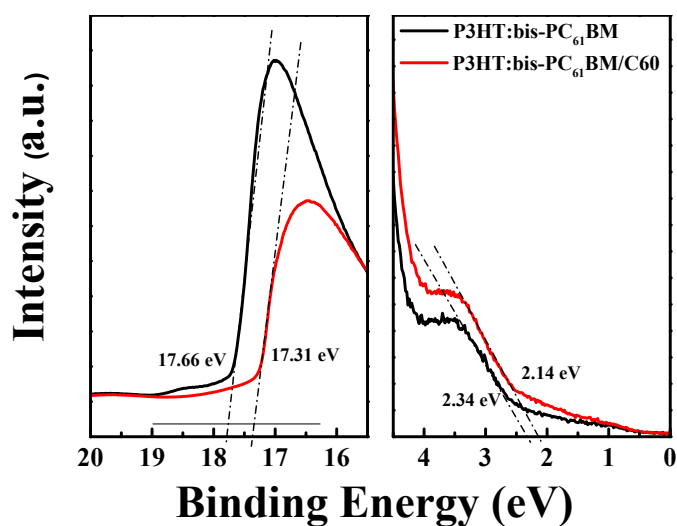

Figure S4 UPS spectra of P3HT:bis-PC<sub>61</sub>BM film (a) and P3HT:bis-PC<sub>61</sub>BM/C<sub>60</sub> film (b).

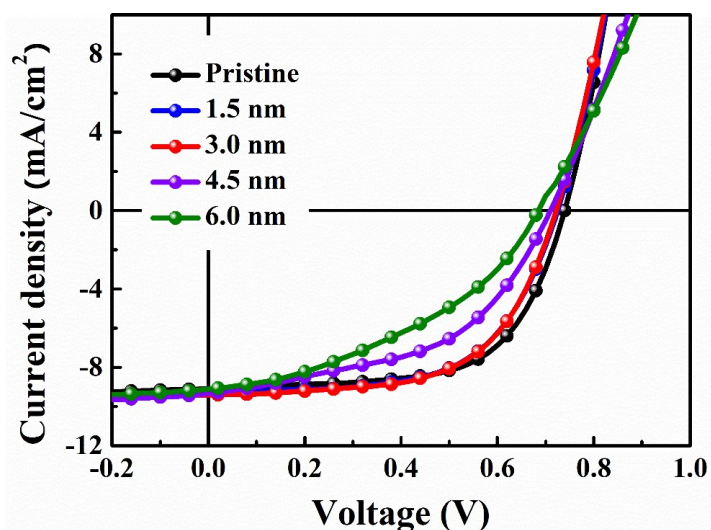

Figure S5  $J$ - $V$  curves of ITO/ZnO/P3HT:bis-PC<sub>61</sub>BM/C<sub>60</sub>/MoO<sub>3</sub>/Al solar cells with different thickness of C<sub>60</sub> layer

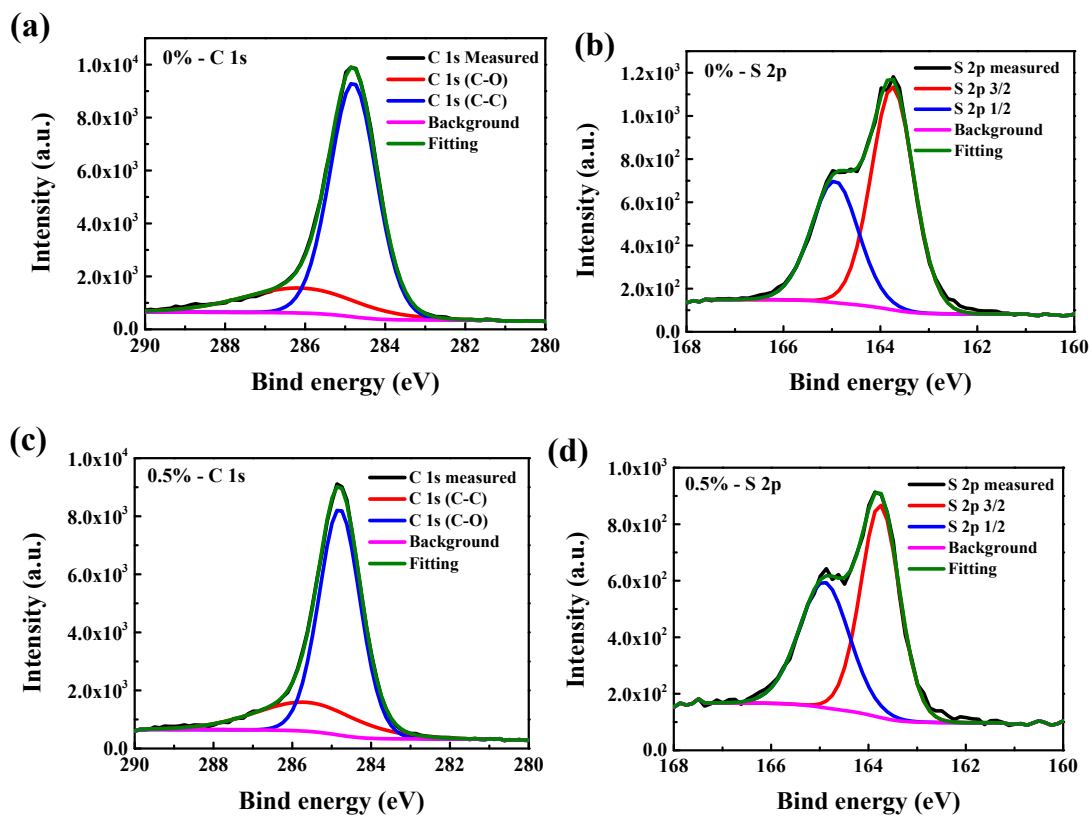

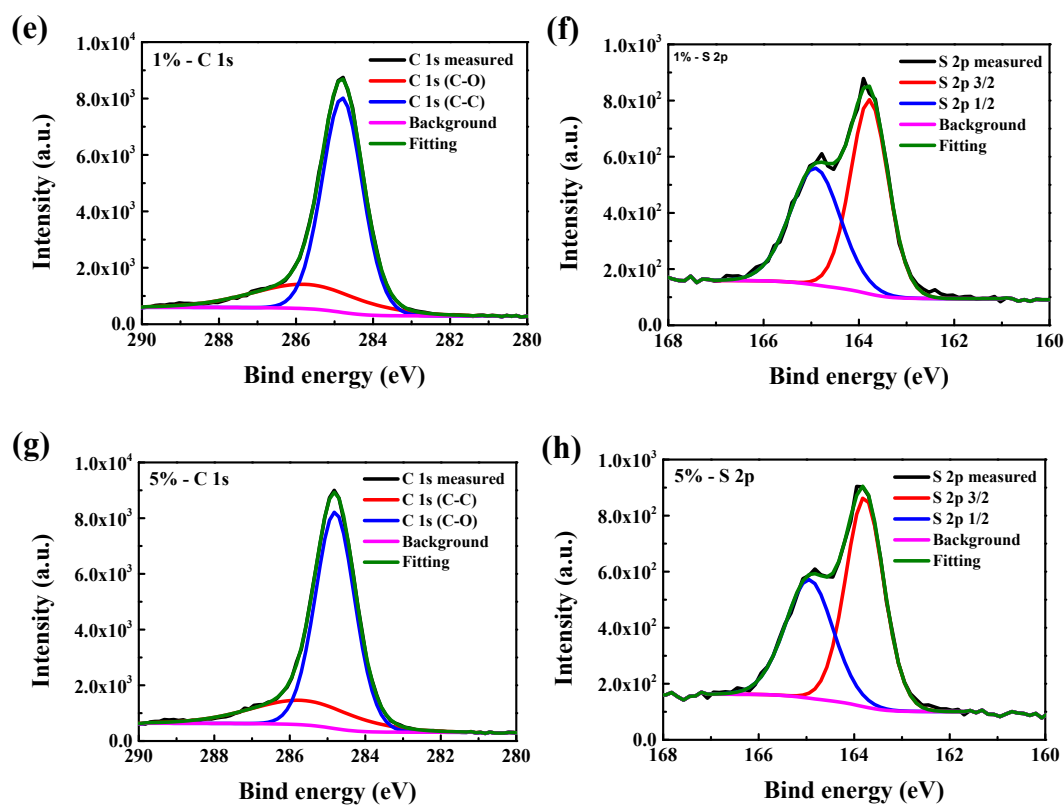

Figure S6 High-resolution deconvoluted XPS spectra of (a, c, e, g) C 1s and (b, d, f, h) S 2p of P3HT:bis-PC<sub>61</sub>BM blend films with different concentration (0-5%) of piperazine

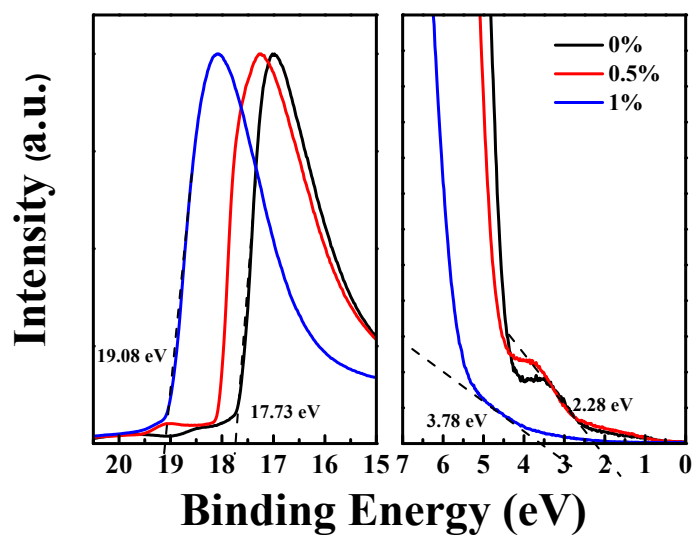

Figure S7 UPS spectra of P3HT:bis-PC<sub>61</sub>BM blend films with different concentration (0-5%) of piperazine

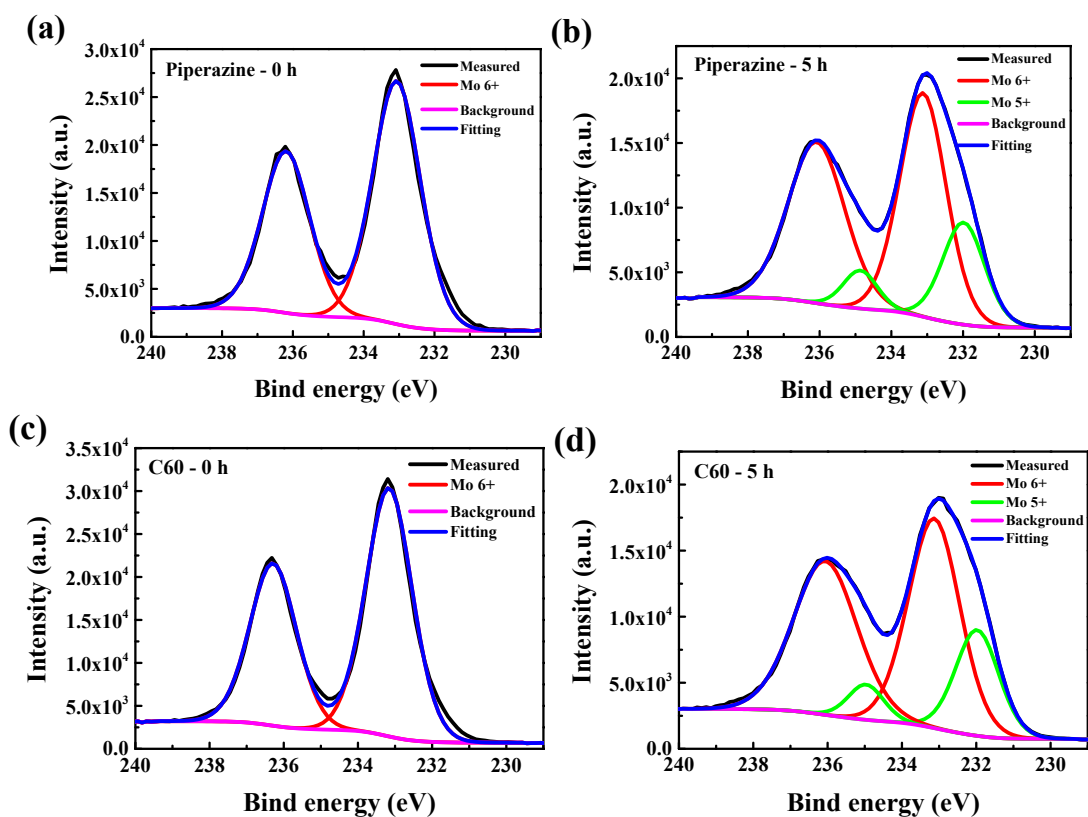

Figure S8 XPS spectra of the Mo 3d core level peaks for the P3HT:bis-PC<sub>61</sub>BM:piperazine/MoO<sub>3</sub> films (a, b) and P3HT:bis-PC<sub>61</sub>BM/C60/MoO<sub>3</sub> films (c, d) before and after illumination for 5 h.

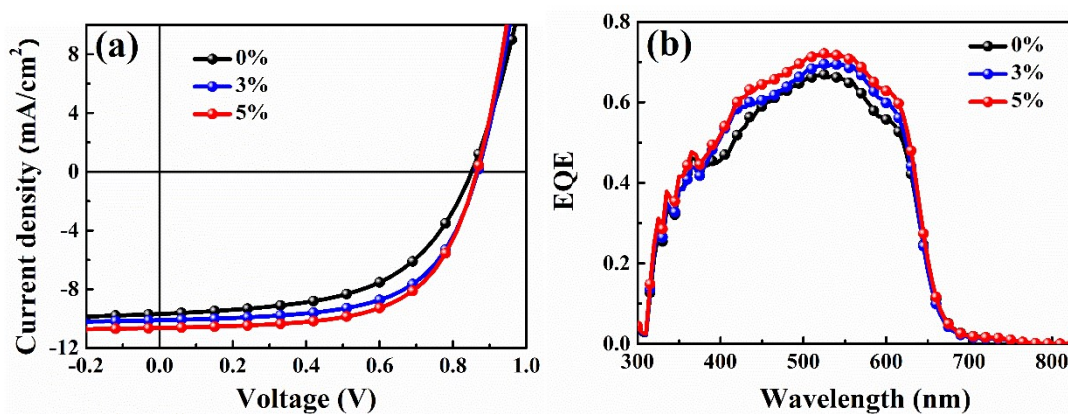

Figure S9  $J$ - $V$  curves (a) and EQE spectra (b) of P3HT:ICBA cells with piperazine doping concentration of 0-5%

Table S1 Photovoltaic parameters of ITO/ZnO/P3HT:bis-PC<sub>61</sub>BM/C60/MoO<sub>3</sub>/Al solar cells with different thickness of C<sub>60</sub> layer

| <b>C<sub>60</sub> film thickness (nm)</b> | <b><i>J</i><sub>sc</sub> (mA·cm<sup>2</sup>)</b> | <b><i>V</i><sub>oc</sub> (V)</b> | <b>FF</b>            | <b>PCE (%)</b>      |
|-------------------------------------------|--------------------------------------------------|----------------------------------|----------------------|---------------------|
| 0                                         | 9.22<br>(9.15±0.13)                              | 0.73<br>(0.73±0.005)             | 0.62<br>(0.61±0.016) | 4.17<br>(4.08±0.15) |
| 1.5                                       | 9.36<br>(9.31±0.13)                              | 0.72<br>(0.71±0.008)             | 0.60<br>(0.59±0.008) | 4.06<br>(3.92±0.13) |
| 3                                         | 9.40<br>(9.34±0.14)                              | 0.72<br>(0.71±0.006)             | 0.60<br>(0.59±0.006) | 4.07<br>(3.91±0.14) |
| 4.5                                       | 9.34<br>(9.21±0.14)                              | 0.71<br>(0.71±0.007)             | 0.49<br>(0.48±0.006) | 3.27<br>(3.20±0.10) |
| 6                                         | 9.12<br>(9.08±0.16)                              | 0.69<br>(0.69±0.001)             | 0.41<br>(0.39±0.009) | 2.54<br>(2.46±0.12) |

Table S2 Photovoltaic parameters of P3HT:ICBA cells with piperazine doping concentration of 0-5%

| <b>Piperazine doping concentration</b> | <b><i>J</i><sub>sc</sub> (mA·cm<sup>2</sup>)</b> | <b><i>V</i><sub>oc</sub> (V)</b> | <b>FF</b>              | <b>PCE (%)</b>        |
|----------------------------------------|--------------------------------------------------|----------------------------------|------------------------|-----------------------|
| 0                                      | 9.69<br>(9.61 ± 0.15)                            | 0.848<br>(0.844 ± 0.003)         | 0.55<br>(0.55 ± 0.003) | 4.52<br>(4.44 ± 0.09) |
| 3%                                     | 10.11<br>(10.09 ± 0.16)                          | 0.869<br>(0.866 ± 0.004)         | 0.61<br>(0.60 ± 0.02)  | 5.36<br>(5.24 ± 0.16) |
| 5%                                     | 10.64<br>(10.59 ± 0.07)                          | 0.867<br>(0.865 ± 0.002)         | 0.62<br>(0.60 ± 0.02)  | 5.72<br>(5.50 ± 0.16) |
